# Supplementary material
Source: PubMed Central journal article supplement (PMC4768803)
Supplement: NIHMS760855-supplement-supplement_1.pdf [file NIHMS760855-supplement-supplement_1.pdf]

**Figure 5.** Detection of deiminated proteins and PAD3 in injured E11 and E15 spinal cords. F95 is red and nuclear counterstain is blue **A-C**) Double-labelling for F95 (red) and NeuN (A), GFAP (B) and MBP (C) (all green) in E15 spinal cords 24 hours after injury. **D**) Double-labelling for PAD3 (red) and MBP (green) in E15 spinal cords 24 hours after injury. **E**) Double-labelling for F95 (red) and TUNEL (green) in E11 spinal cord 24 hours post-injury. **F**) Double-labelling for PAD3 (red) and TUNEL (green) in E15 24 hours post-injury. Scale bars = 20  $\mu\text{m}$  (A, C, E,F); 10  $\mu\text{m}$  (D).

**Figure 6.** Effect of Cl-amidine treatment on E15 chick spinal cords 24 hours after injury assessed by hematoxylin and eosin staining (A-B), co-labelling for deiminated proteins with the F95 antibody and for apoptosis by TUNEL (D-E), and staining for deiminated H3 (H-I'). **A**) Control spinal cord injury; note large cavity. **B**) Injured spinal cord treated with 80 mg/Kg Cl-amidine; note the reduction in cavity size. **C**) Quantitative analysis of cavity size (n=6; m $\pm$ sd); note significant reduction (ANOVA, p $\leq$ 0.001) following Cl-amidine treatment. **D**) F95 (red) and TUNEL (green) labelling of injured control spinal cord; note extensive deimination and apoptosis. **E**) F95 (red) and TUNEL (green) labelling of injured Cl-amidine-treated spinal cord. **E'**) Higher magnification of the dotted box in (E); note the reduction in both deimination and apoptosis in the treated spinal cord; the white arrowhead points to an apoptotic cell and the yellow arrow to a cell double-labelled for TUNEL and F95. **F**) Density of TUNEL-positive cells in control and Cl-amidine-treated animals scored at different distances from the injury (n=4; m $\pm$ sd). The boxes indicate the scoring criteria used to evaluate the extent of apoptosis from very low/negative (1) to high (4). Note significant reduction (\* p $\leq$ 0.04; Student's t-test) following Cl-amidine treatment close to the injury side and absence of TUNEL-positive cells from 2 mm from the injury site in Cl-amidine-treated spinal cords. **G**) Western blot detecting histone 3 (H3) in immunoprecipitated deiminated protein fractions from 1) E11 sham-operated, 2) E15 sham-operated and E15 injured spinal cords. **H**) Control injured spinal cord; deiminated H3 (CitH3, green) is detected in the injured region in E15 spinal cords (arrows) and commonly associated with nuclei of apoptotic morphology (see insert). **I-I')** Cl-amidine-treated injured spinal cord; note greatly decreased expression of CitH3 around the injury site (box enlarged in I') compared to (H-H'). Scale bars = 260  $\mu\text{m}$  (A,B,D,H,I); 130  $\mu\text{m}$  (E); 65  $\mu\text{m}$  (E', I'), 20  $\mu\text{m}$  (insert in H).

**Supplementary Figure 1.** Deiminated proteins detected by immunohistochemistry with F95 antibody (red) in E11 and E15 spinal cords and co-labelling for F95 and TUNEL (green) in E15 spinal cord treated with the Ca<sup>++</sup> ionophore BAPTA at the time of injury. F95 is red and nuclear counterstain is blue. **A**) No F95 reactivity is observed in E11 sham-operated spinal cord. **B**) F95 staining in E15 sham-operated spinal cord; no F95 reactivity is observed. **C**) F95 and TUNEL detection in an E15 spinal cord 24 hours after injury (DMSO control). **D**)

F95 and TUNEL detection in a BAPTA-treated E15 spinal cord 24 hours after injury. Scale bars = 130  $\mu\text{m}$  (A-B); 65  $\mu\text{m}$  (C-D).

**Supplementary Figure 2.** Western blot of proteins from individual E11 sham-operated and injured spinal cords 2 hours after surgery. Deiminated proteins (F95) are shown in the upper blot and the loading control (actin) in the lower panel.

**Supplementary Figure 3.** Staining for deiminated proteins (F95, red) and TUNEL (green) in E15 spinal cords 8 hours (A) and 4 days (B-C") post injury. **A)** Eight hours after injury TUNEL-positive cells start to be detected and some co-localization with F95 is observed. The arrowhead points at a double-labelled cell magnified in the insert. **B)** H & E staining of a section from an E15 spinal cord 4 days after injury. **C)** F95 and TUNEL staining of a section from the same spinal cord shown in (B). Deiminated proteins and TUNEL positive cells are mainly found in the islands of tissue debris in the cavity and at the edges of the cavity. **C'-C")** High magnification of some double-labelled cells found in tissue islands (arrows). Scale bars = 20  $\mu\text{m}$  (A); 250  $\mu\text{m}$  (B, C).

**Supplementary Table 1.** Mass spectrometry-based identification of proteins immunoprecipitated by the anti-PAD3 antibody

| Gel Band | Accession Number                     | Protein Name                   | Species       | mW (Da) | pI (pH) | PLGS Score | Peptides                                                                                                                                                                                                                | Coverage (%) |
|----------|--------------------------------------|--------------------------------|---------------|---------|---------|------------|-------------------------------------------------------------------------------------------------------------------------------------------------------------------------------------------------------------------------|--------------|
| 1        | P84229                               | Histone H32                    | Gallus gallus | 15378   | 11.7    | 229        | 81- TDLR -84<br>85- FQSSAVMALQEASEAYLVGLFEDTNLCAIHAK -116<br>118- VTIMPKDIQLAR -129<br>124- DIQLAR -129<br>124- DIQLARR -130                                                                                            | 36.0294      |
|          | P70081<br>P62801<br>P70082           | Histone H4 type VIII           |               | 11432   | 11.7    | 97         | 25- DNIQGITKPAIR -36<br>47- ISGLIYEETRGVLKVFLENVIR -68                                                                                                                                                                  | 24.2718      |
|          | P70082                               | Histone H4                     |               | 11360   | 11.8    | 97         | 25- DNIQGITKPAIR-36<br>81-TVTAMDVVYALKR-93                                                                                                                                                                              | 33.0097      |
|          | P02272<br>P84229<br>P02552           | Histone H2AJ                   |               | 14007   | 11.3    | 597        | 44- VGAGAPVYMAAVLEYLTAEILELAGNAAR -72                                                                                                                                                                                   | 22.4806      |
|          |                                      | Histone H2AJ                   | Gallus gallus | 14007   | 11.3    | 619        | 44- VGAGAPVYMAAVLEYLTAEILELAGNAAR -72                                                                                                                                                                                   | 22.4806      |
| 2        |                                      | Histone H2A V                  |               | 13500   | 11.0    | 565        | 47- VGATAAVYSAAILEYLTAEVLELAGNASK -75                                                                                                                                                                                   | 22.6563      |
|          | P09642<br>P32882<br>P09206<br>P09244 | Histone H32                    |               | 15378   | 11.7    | 204        | 44-VGAGAPVYMAAVLEYLTAEILELAGNAAR -72                                                                                                                                                                                    | 23.5294      |
|          | P84229<br>P62801<br>P70082           | Tubulin alpha 1 chain Fragment |               | 45871   | 4.8     | 630        | 26- AVFVDLEPTVIDEVR -40<br>33- PTVIDEVR -40<br>46- QLFHPEQLITGKEDAANNYAR -66<br>177- NLDIERPTYTNLNR -190<br>191- LIGQIVSSITASLR -204<br>288- DVNAAIATIK -297<br>301- TIQFVDWCPTGFK -313<br>314- VGINYQPPTVVPGGDLAK -331 | 25.4854      |
| 3        |                                      | Tubulin alpha 3 chain Fragment | Gallus gallus | 36064   | 5.0     | 267        | 91- NLDIERPTYTNLNR -104<br>156- AYHEQLSVPEITNACFEFSNQMVK -179<br>228- VGINYQPPTVVPGGDLAK -245<br>215- SIQFVDWCPTGFK -227                                                                                                | 21.4286      |

|   |                      |       |      |     |                                                                                                       |         |
|---|----------------------|-------|------|-----|-------------------------------------------------------------------------------------------------------|---------|
| 4 | Tubulin beta 2 chain | 49920 | 4.6  | 332 | 3- EIVHIQAGQCGNQIGAK -19<br>47- INVYYNEATGNK -58<br>155- IREEYPDR -162<br>337- NSSYFVEWIPNNVK -350    | 11.4607 |
|   | Tubulin beta 3 chain | 49829 | 4.6  | 198 | 47- INVYYNEATGGK -58<br>155- IREEYPDR -162<br>337- NSSYFVEWIPNNVK -350                                | 7.6404  |
|   | Tubulin beta 7 chain | 49638 | 4.6  | 252 | 3- EIVHIQAGQCGNQIGAK -19<br>63- AILVDLEPGTMDSVR -77<br>155- IREEYPDR -162<br>337- NSSYFVEWIPNNVK -350 | 12.1622 |
|   | Histone H32          | 15378 | 11.7 | 165 | 85- FQSSAVMALQEASEAYLVGLFEDTNLCAIHAK -116<br>118- VTIMPKDIQLAR -129<br>124- DIQLAR -129               | 32.3529 |
|   | Histone H4           | 11360 | 11.7 | 151 | 25- DNIQGITKPAIR -36<br>81- TVTAMDVVYALK -92                                                          | 23.301  |
|   | Histone H2A J OS     | 14007 | 11.3 | 545 | 44- VGAGAPVYMAAVLEYLTAEILELAGNAAR -72                                                                 | 22.4806 |

Immunoprecipitated samples were run on SDS-PAGE gels and the most prominent 4 bands (on silver staining) were excised from the gel and processed for identification by mass spectrometry (LC-MS/MS). The presence of several proteins within a 1D gel band results from co-migration of immunoprecipitated proteins with similar molecular weight.
